# Supplementary material
Source: PubMed Central journal article supplement (PMC3919506)
Supplement: NIHMS533796-supplement-2.pdf [file NIHMS533796-supplement-2.pdf]

# Supplemental Figure 2. Splicing primer pair dissociation curves

Intron1-Forward + Boundary2/3-Reverse

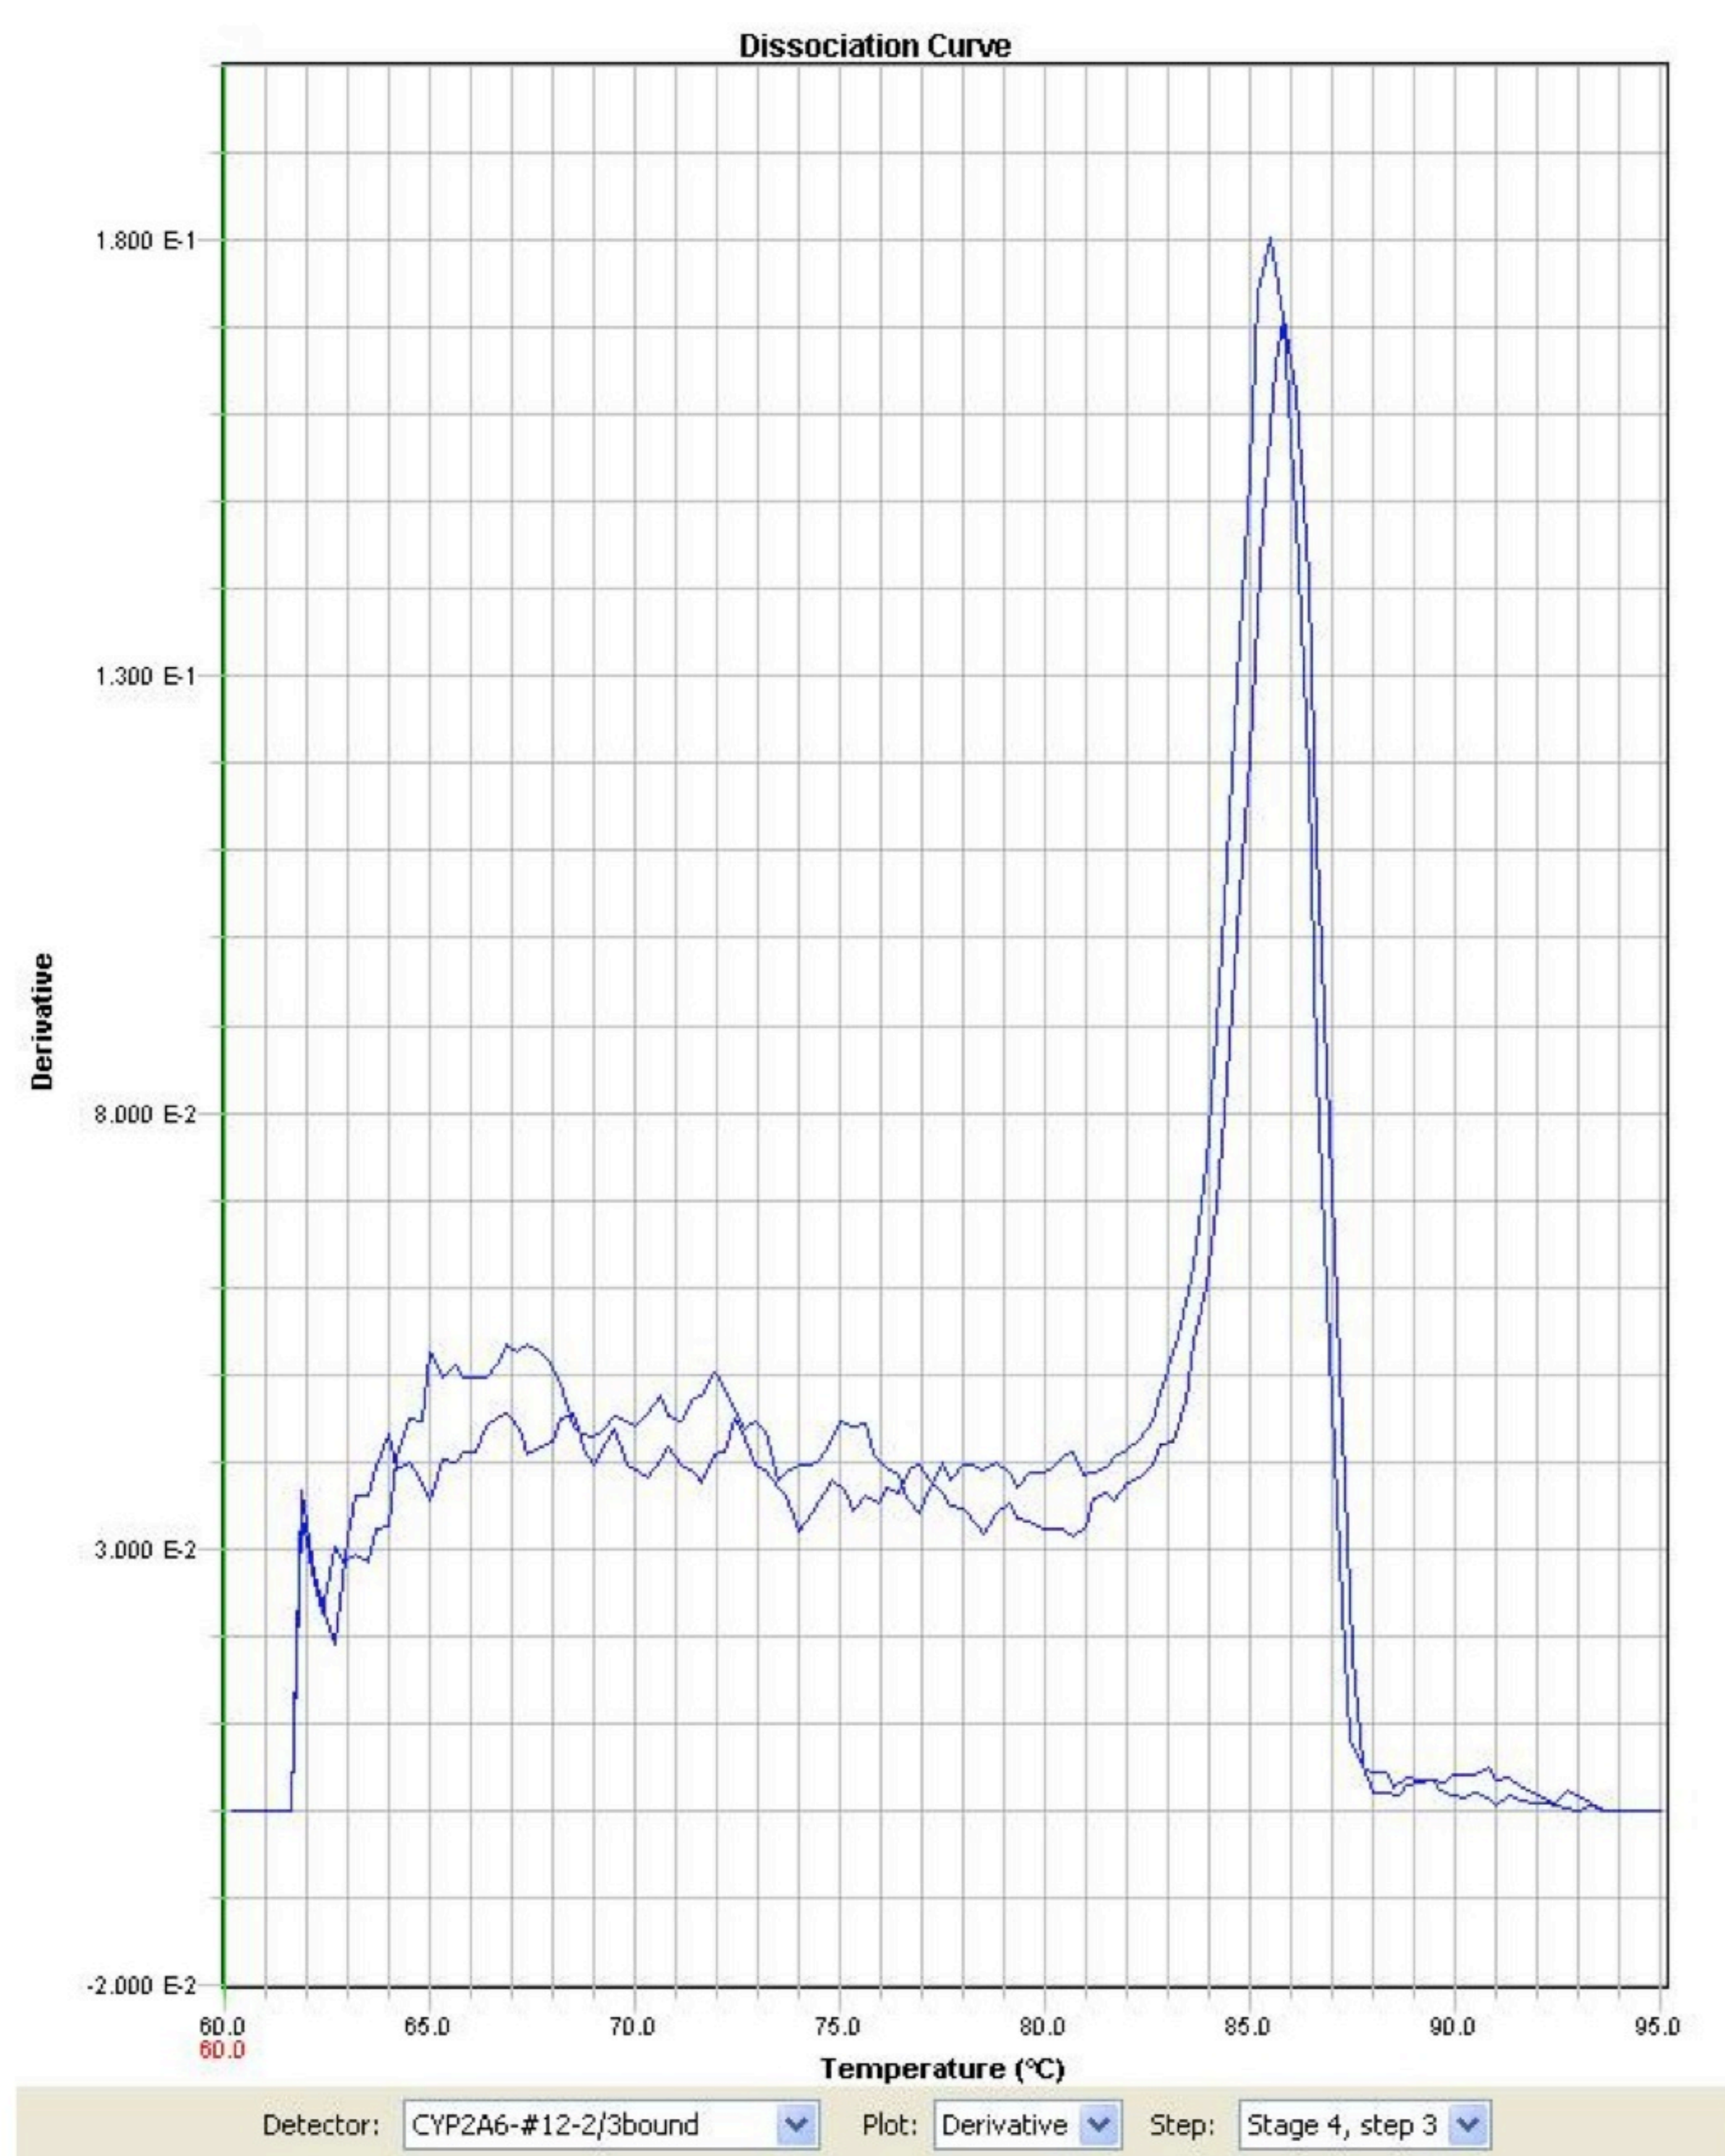

Intron1-Forward + Exon2-Reverse

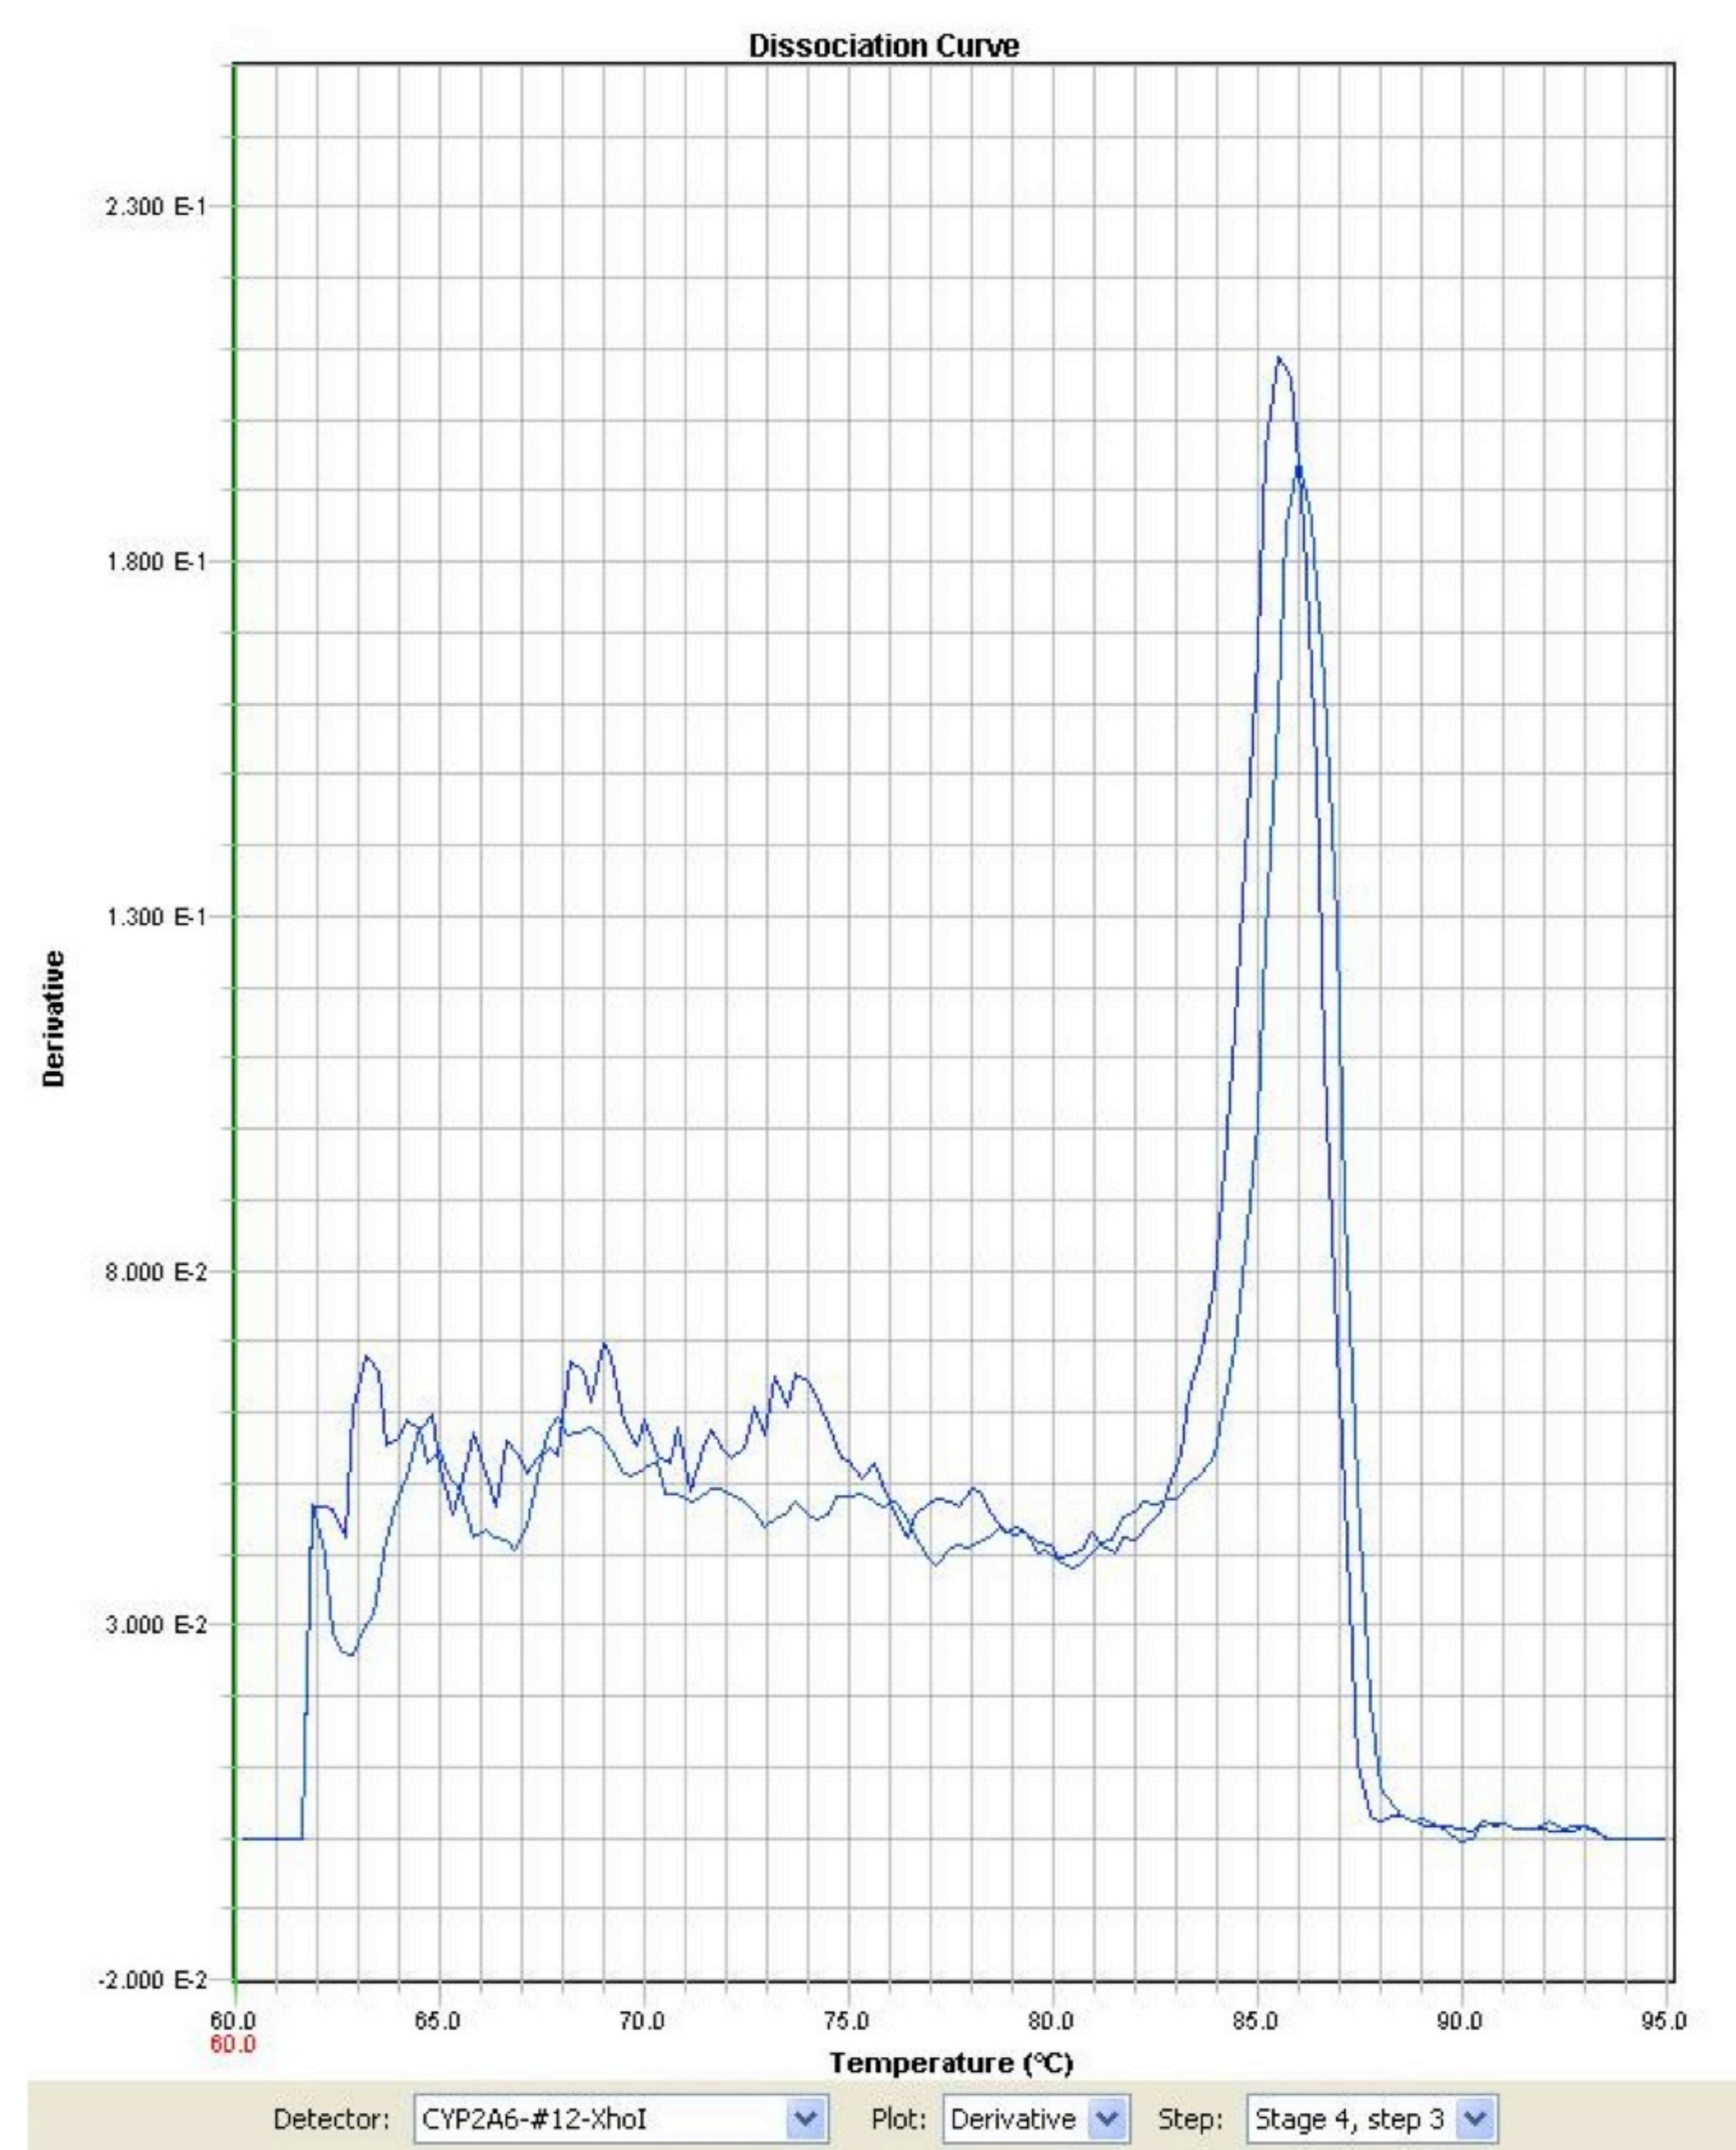

Boundary1/2-Forward + Boundary2/3-Reverse

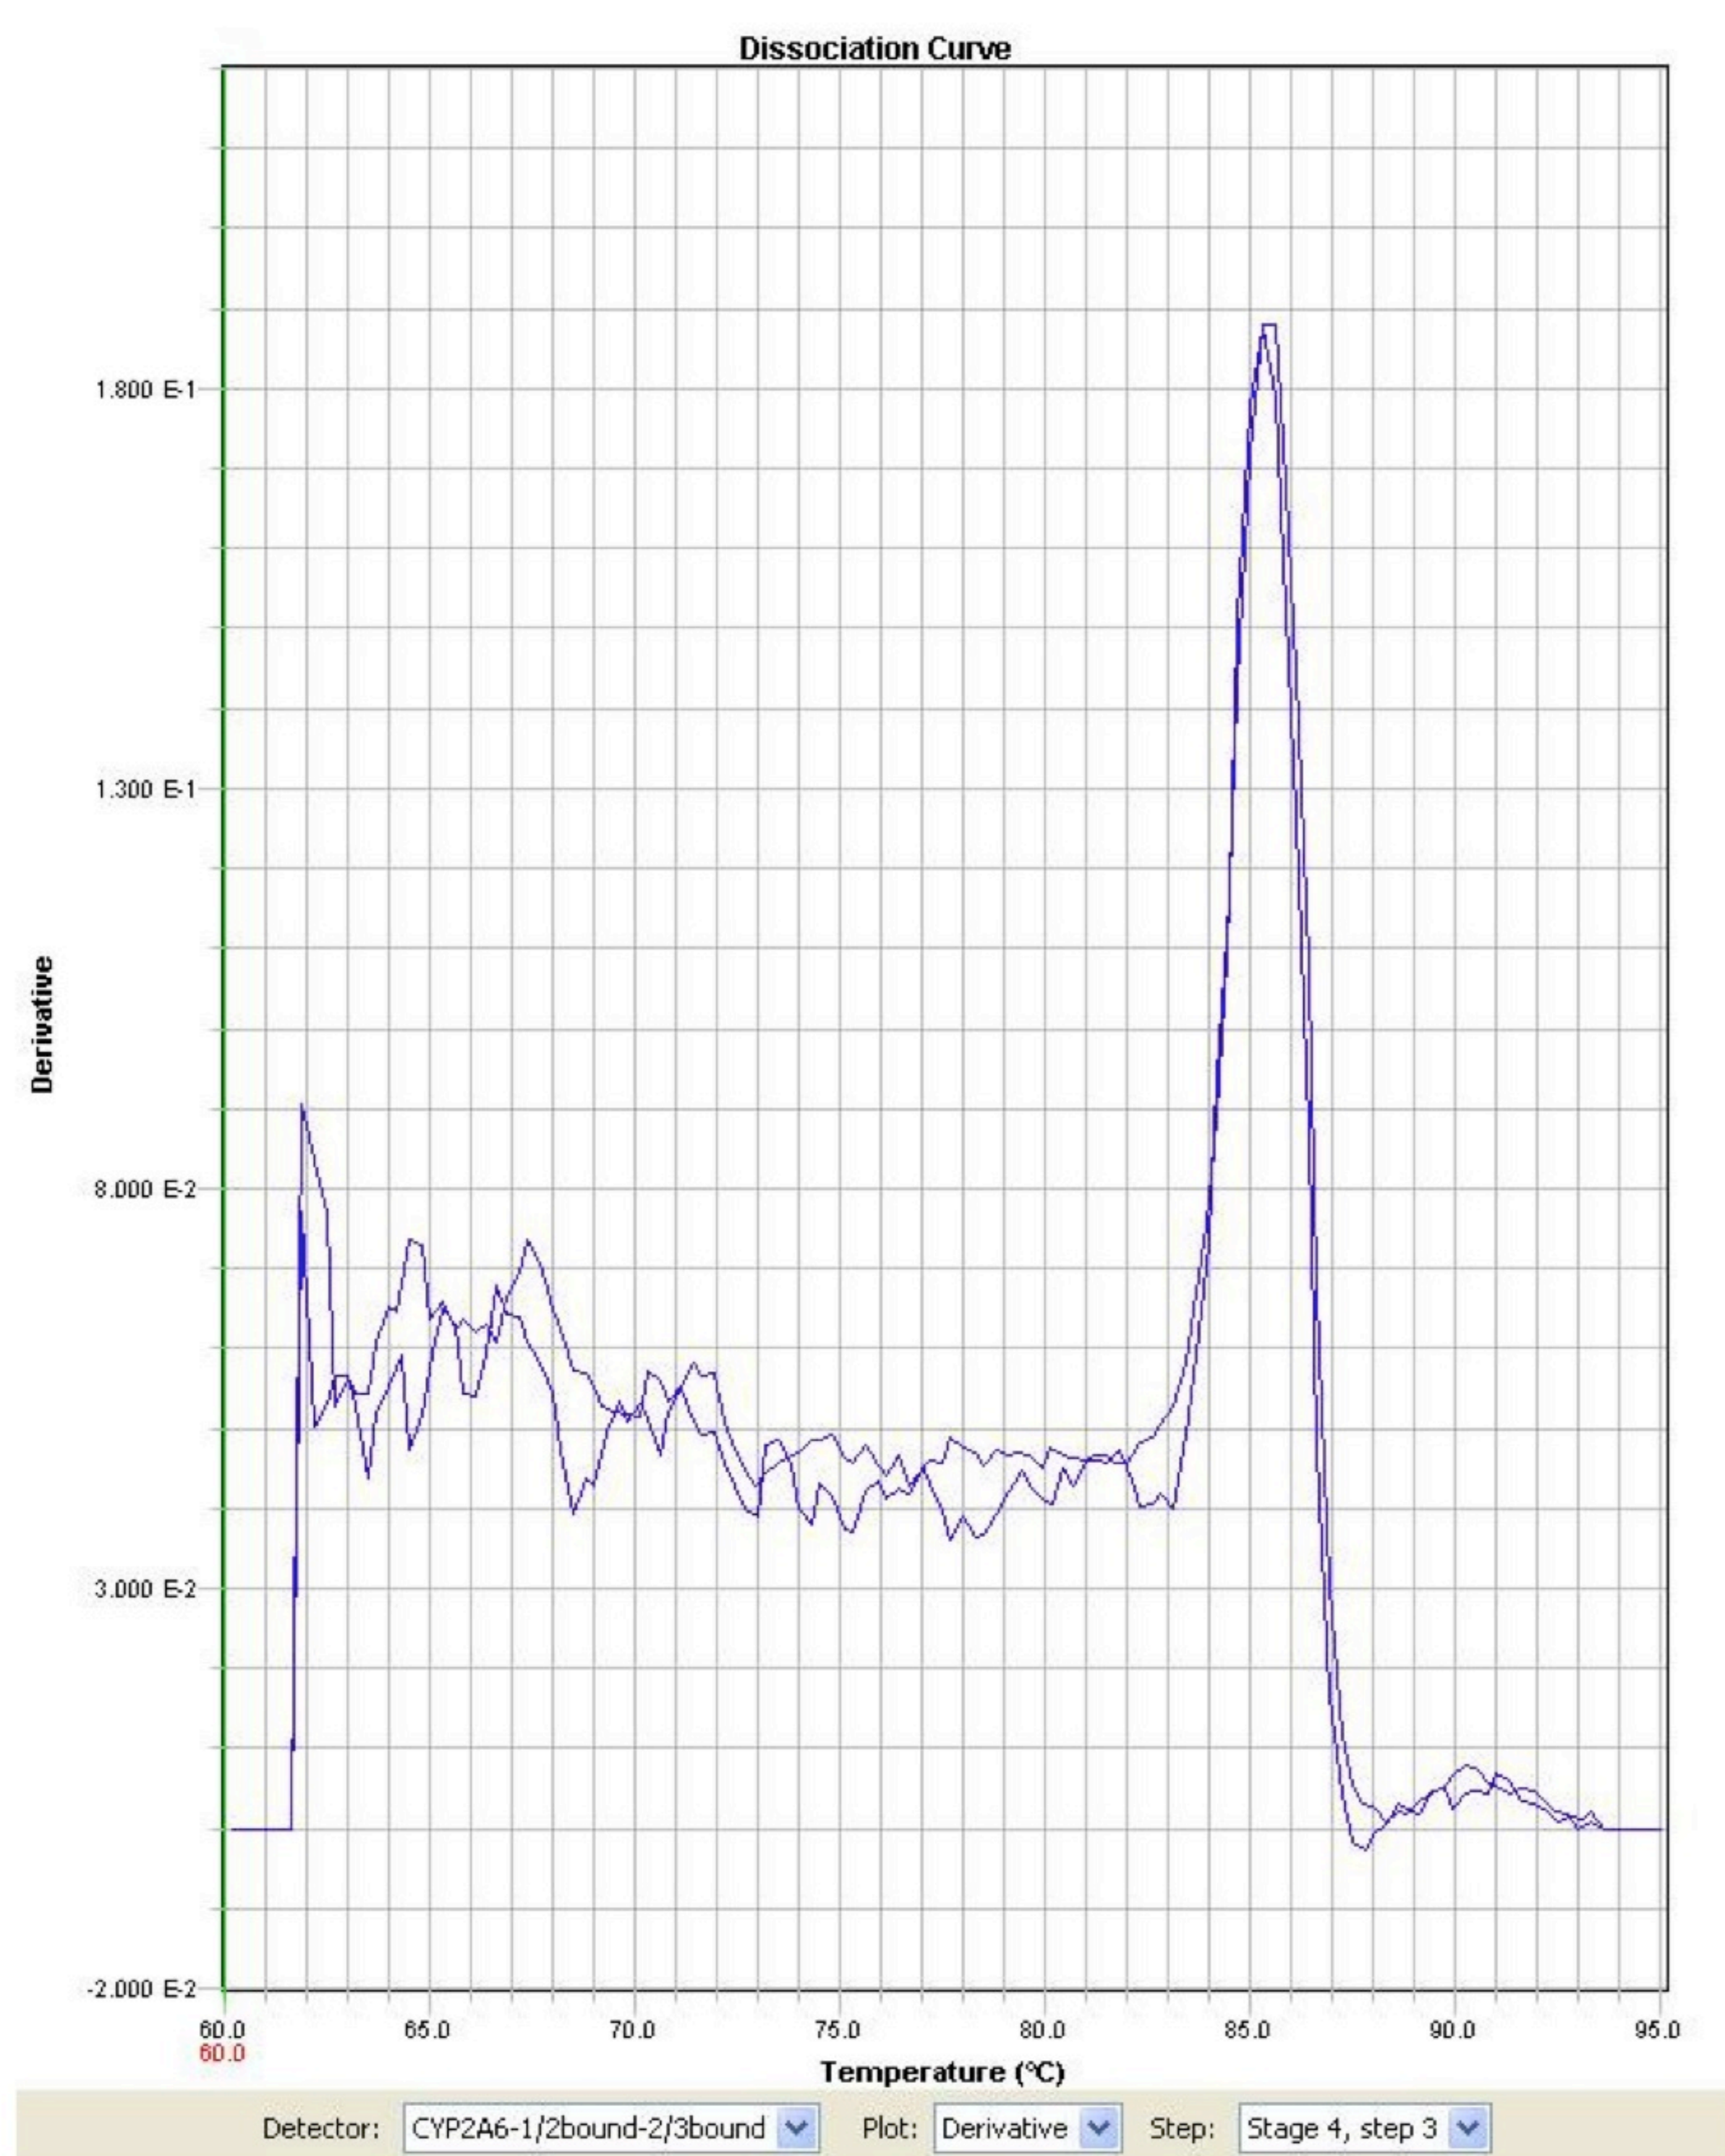

Boundary1/2-Forward + Exon2-Reverse

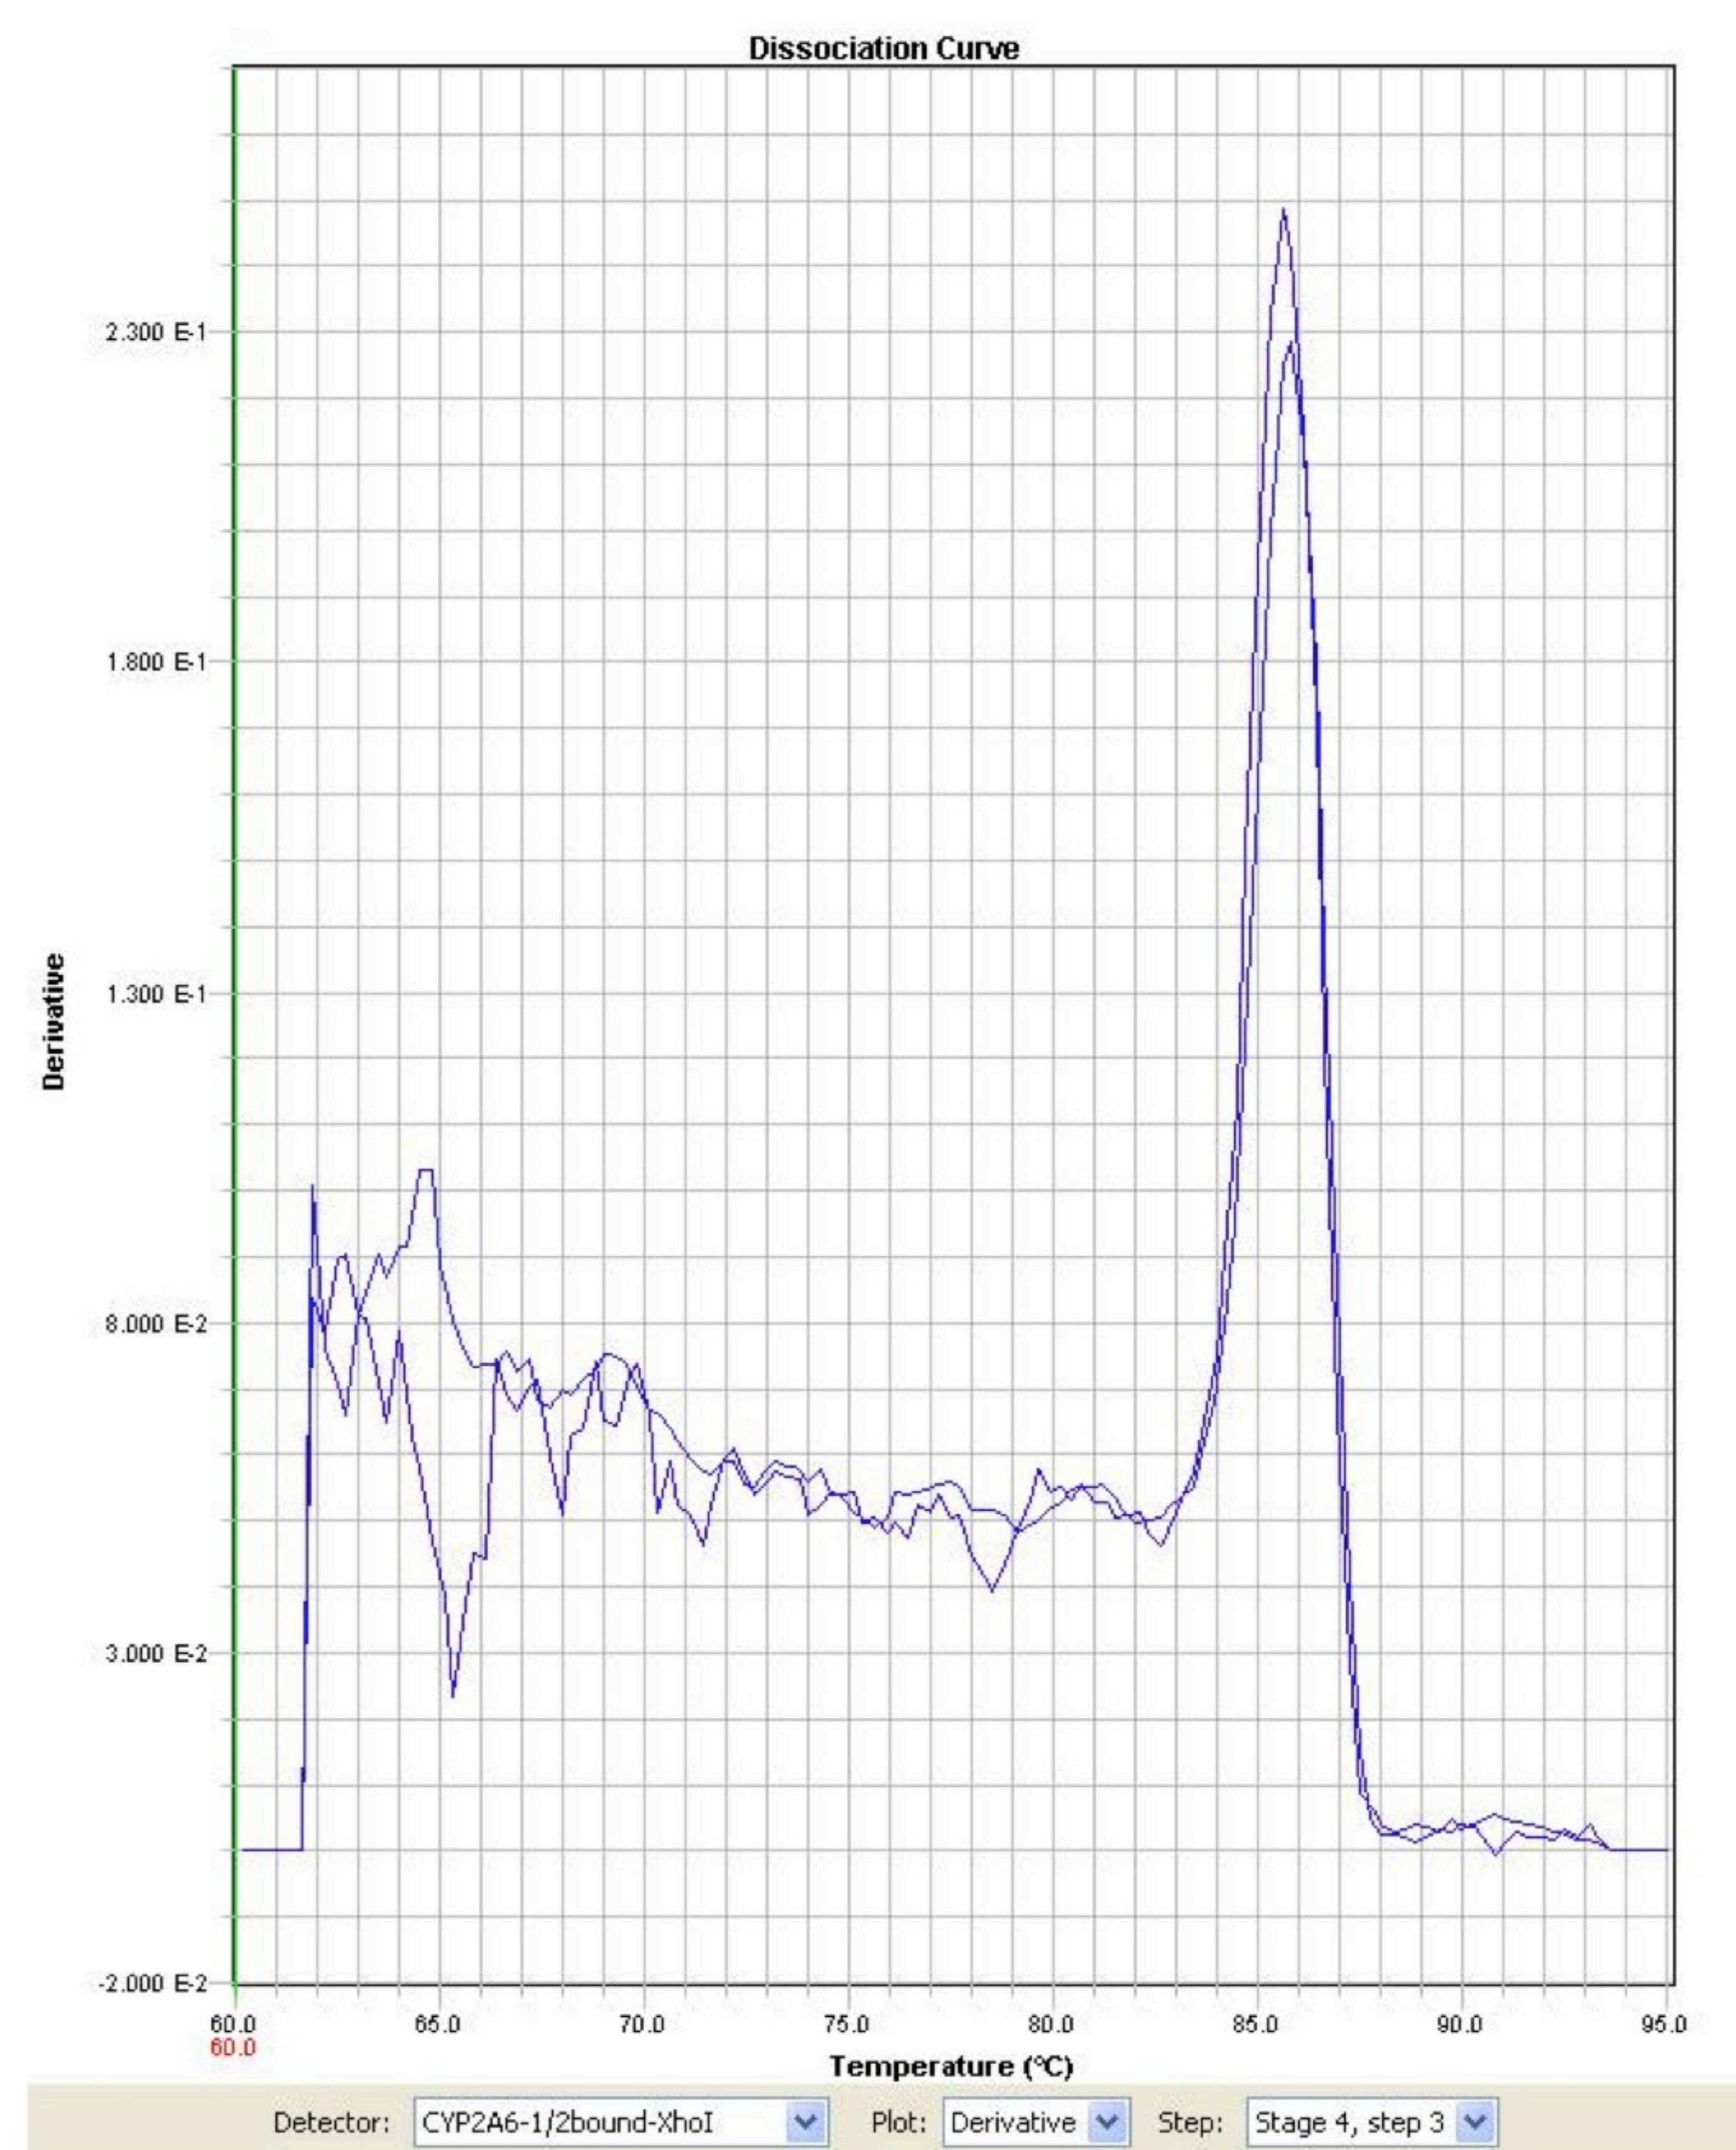

Two representative dissociation curves from two liver cDNA samples for each primer pair, superimposed
